# Supplementary material for: Functional UiO-66 for highly selective adsorption of N-nitrosodipropylamine: adsorption performance and mechanisms
Source: Royal Society of Chemistry journal article supplement (doi:10.1039/d3dt03058j), 2024-01-01
Supplement: d3dt03058j1.pdf [file d3dt03058j1.pdf]

## Supporting Information

# Functional UiO-66 for highly selective adsorption of N-nitrosodipropylamine: Adsorption performance and mechanisms

Jinfeng Chen<sup>a,b,1</sup>, Ning Yao<sup>a,b,1</sup>, Yi Tang<sup>a,b</sup>, Letian Xie<sup>a,b</sup>, Xiong Zhuo<sup>c</sup>, Zhuwu

Jiang<sup>a,b\*</sup>

<sup>a</sup>. *College of Ecological Environment and Urban Construction, Fujian University of Technology, Fuzhou, Fujian 350118, China*

<sup>b</sup>. *Fujian Engineering Research Center of Water Pollution Control and System Intelligence Technology, Fuzhou, Fujian 350118, China*

<sup>c</sup> *Fuzhou City Construction Design & Research Institute Co., Ltd., Fuzhou, Fujian 350001, China*\* Corresponding Author.

*E-mail address: jiangzhuwu@126.com (Zhuwu Jiang)*

## 1 Adsorption kinetics

$$q_t = q_e(1 - e^{-K_1 t}) \quad (1)$$

$$q_t = \frac{q_e^2 K_2 t}{1 + (q_e K_2 t)} \quad (2)$$

$$q_t = K_3 t^{0.5} + C \quad (3)$$

In the above formula,  $q_t$  ( $\mu\text{g/g}$ ) represents the amount of NDEA adsorbed at  $t$  (h) time.

$q_e$  ( $\mu\text{g/g}$ ) represents the amount of NDEA adsorbed at equilibrium.  $K_1$ ,  $K_2$ ,  $K_3$  represent the equilibrium constants of pseudo-first-order, pseudo-second-order and intraparticle diffusion model dynamic equations.  $C$  represents the characteristic constant of the boundary layer.

## 2 Adsorption isotherms

$$q_e = \frac{q_m K_L C_e}{1 + K_L C_e} \quad (4)$$

$$q_e = K_F C_e^{\frac{1}{n}} \quad (5)$$

$$q_e = \frac{RT \ln(K_T C_e)}{\beta} \quad (6)$$

In the above formula,  $q_e$  ( $\mu\text{g/g}$ ) represents the amount of adsorption at equilibrium;  $C_e$  ( $\mu\text{g/ml}$ ) represents the remaining NDEA;  $q_m$  ( $\mu\text{g/g}$ ) represents the maximum adsorption capacity of the adsorbent;  $K_L$ ,  $K_F$  and  $K_T$  represent the constants of Langmuir, Freundlich and Temkin models, respectively.  $1/n$  value represents adsorption capacity index.  $\beta$  is a constant.  $R$  ( $8.314 \text{ J/mol}\cdot\text{K}$ ) and  $T$  ( $298 \text{ K}$ ) were the universal gas constant and temperature in Kelvin, respectively.

### **3 Methods and detection limits**

For the capture limit of DNPA by adsorbent materials, a method of quantitative analysis of DNPA by gas chromatography-mass spectrometry (GC-MS) was established by using the pretreatment method of liquid-liquid extraction, and a standard working curve of  $y=28294x+24456$  ( $R^2=0.996$ ) with the linear range of 0.1-10  $\mu\text{g/mL}$  was obtained. According to the method, the detection limit of DNPA was 0.0123  $\mu\text{g/mL}$ , and the limit of quantification (LOQ) was 0.0409  $\mu\text{g/mL}$ . The recoveries of DNPA spiked samples in tap water ranged from 92.20% to 105.23%.

**Table S1 Structural formula of seven kinds of N-DBPs**

| Compound                 | Chemical formula | Structural formula                                                                    |
|--------------------------|------------------|---------------------------------------------------------------------------------------|
| N-nitrosodiethylamine    | NDEA             | 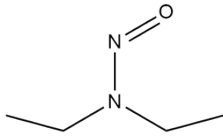   |
| N-nitrosodipropylamine   | NDPA             |    |
| Dichloroacetonitrile     | DCAN             |    |
| Trichloroacetonitrile    | TCAN             |    |
| Bromoacetonitrile        | BAN              |  |
| 2,2-Dichloroacetamide    | DCAcAm           |  |
| 2,2,2-Trichloroacetamide | TCAcAm           |  |

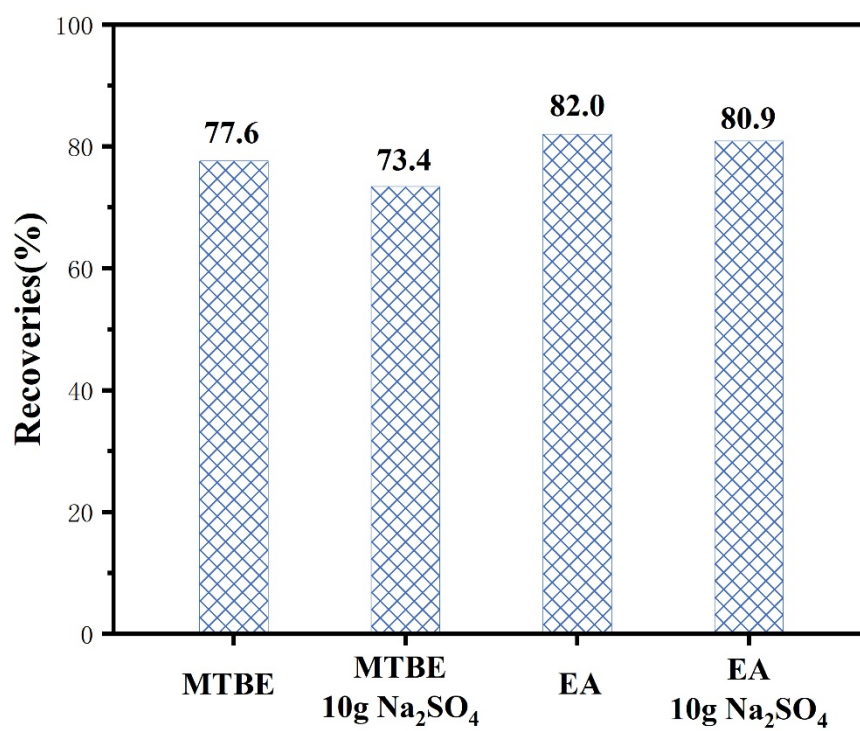

**Fig. S1** Recoveries of NDPA at different organic solvents and salt concentrations.

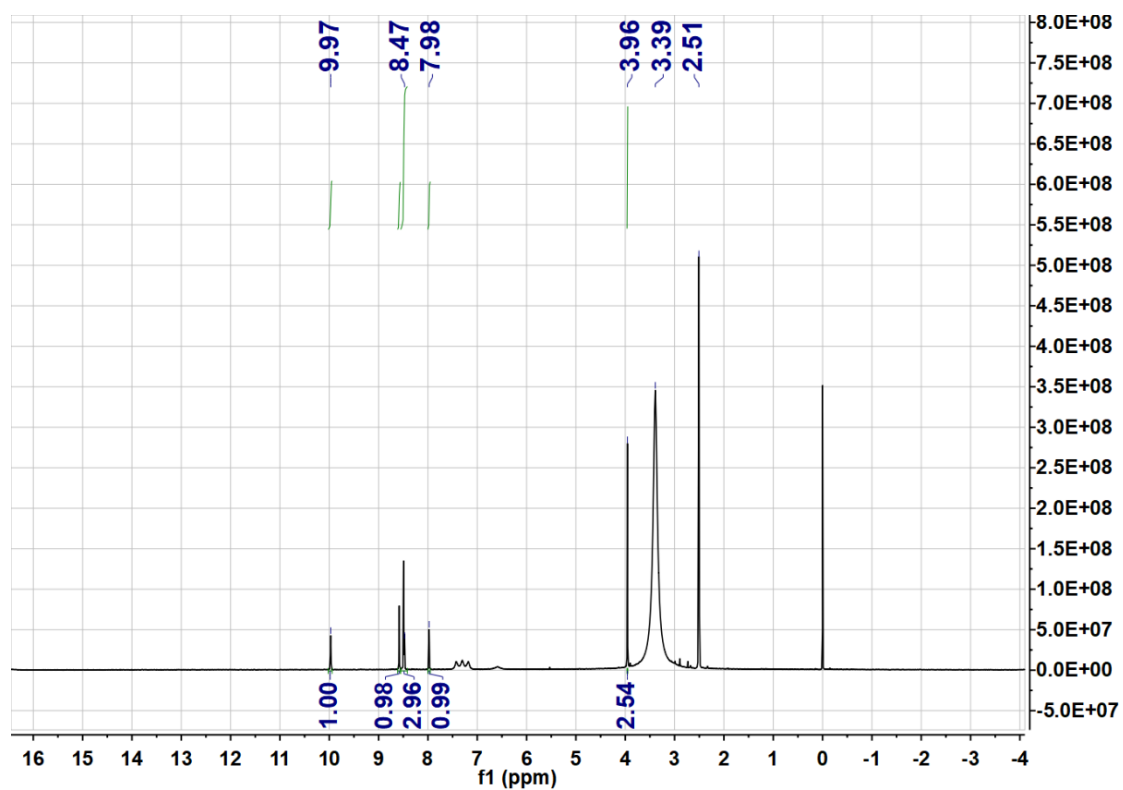

**Fig. S2** <sup>1</sup>H NMR spectrum of digested (I)Meim-UiO-66 sample in DMSO-d<sub>6</sub> (HF)(r.t).

The <sup>1</sup>H NMR spectrum of digested (I)Meim-UiO-66 showed a unique peak at 3.96 attributed to methyl group in Meim-BDC<sup>+</sup>.

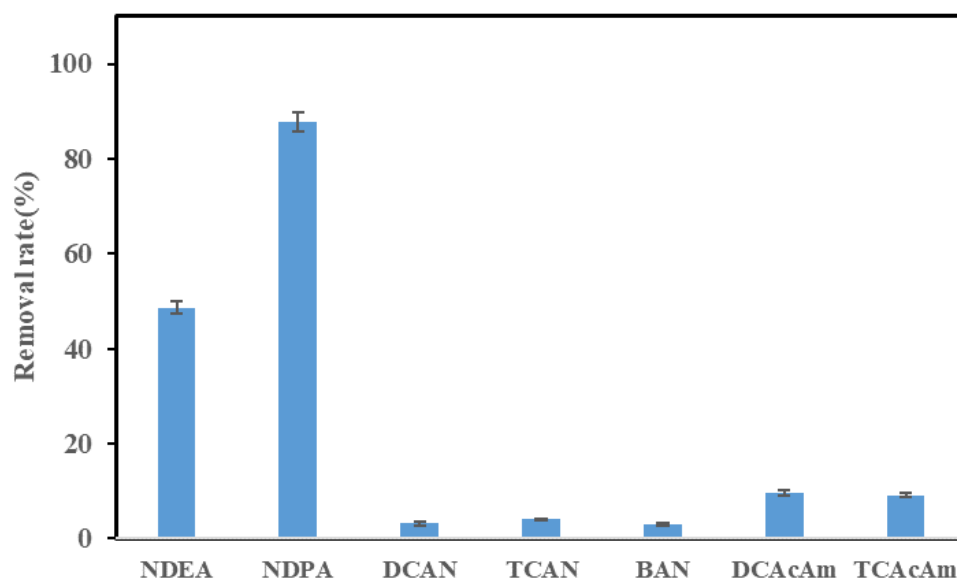

**Fig. S3** Removal rate of seven kinds of N-DBPs by UiO-66-NH<sub>2</sub>.
